# Supplementary material for: Influence of total western diet on docosahexaenoic acid suppression of silica-triggered lupus flaring in NZBWF1 mice
Source: PubMed Central journal article supplement (PMC7228097; doi:10.1371/journal.pone.0233183), 2020-05-15
Supplement: pone.0233183.s001.pdf [file pone.0233183.s001.pdf]

1 **Table S1: Lung fatty acid content as determined by GLC.**

| Common Name         | Chemical Formula  | VEH / CON                 | cSiO <sub>2</sub> / CON    | cSiO <sub>2</sub> / ↑DHA   | cSiO <sub>2</sub> / ↓SF.ω6 | cSiO <sub>2</sub> / ↓SF.ω6↑DHA |    |
|---------------------|-------------------|---------------------------|----------------------------|----------------------------|----------------------------|--------------------------------|----|
|                     |                   | (% of total fatty acids)  |                            |                            |                            |                                |    |
| Lauric              | <b>C12:0</b>      | 0.07 ± 0.02 <sup>A</sup>  | 0.03 ± 0.01 <sup>B</sup>   | 0.04 ± 0.01 <sup>AB</sup>  | 0.02 ± 0.01 <sup>B</sup>   | 0.03 ± 0.00 <sup>AB</sup>      | 2  |
| Myristic            | <b>C14:0</b>      | 1.25 ± 0.17 <sup>A</sup>  | 2.38 ± 0.40 <sup>BC</sup>  | 2.74 ± 0.36 <sup>B</sup>   | 2.21 ± 0.45 <sup>C</sup>   | 2.10 ± 0.22 <sup>C</sup>       | 3  |
| Palmitic            | <b>C16:0</b>      | 31.76 ± 1.70 <sup>A</sup> | 50.09 ± 5.32 <sup>BC</sup> | 52.03 ± 3.45 <sup>BC</sup> | 54.07 ± 3.86 <sup>B</sup>  | 48.55 ± 3.01 <sup>C</sup>      | 4  |
| Palmitolaidic       | <b>C16:1ω7t</b>   | 0.10 ± 0.02 <sup>A</sup>  | 0.10 ± 0.01 <sup>A</sup>   | 0.10 ± 0.01 <sup>A</sup>   | 0.05 ± 0.01 <sup>B</sup>   | 0.04 ± 0.01 <sup>B</sup>       | 5  |
| Palmitoleic         | <b>C16:1ω7c</b>   | 3.21 ± 0.63 <sup>A</sup>  | 4.02 ± 0.24 <sup>B</sup>   | 3.94 ± 0.32 <sup>B</sup>   | 3.07 ± 0.31 <sup>A</sup>   | 2.94 ± 0.38 <sup>A</sup>       | 6  |
| Stearic             | <b>C18:0</b>      | 10.25 ± 1.26 <sup>A</sup> | 5.21 ± 1.02 <sup>B</sup>   | 4.82 ± 0.87 <sup>BC</sup>  | 3.85 ± 0.75 <sup>C</sup>   | 4.39 ± 0.65 <sup>BC</sup>      | 7  |
| Elaidic             | <b>C18:1ω9t</b>   | 0.00 ± 0.00               | 0.00 ± 0.00                | 0.00 ± 0.00                | 0.00 ± 0.00                | 0.00 ± 0.00                    | 8  |
| Oleic               | <b>C18:1ω9c</b>   | 21.01 ± 2.91 <sup>A</sup> | 13.81 ± 3.37 <sup>B</sup>  | 10.43 ± 1.40 <sup>C</sup>  | 15.88 ± 2.10 <sup>BD</sup> | 17.10 ± 1.80 <sup>D</sup>      | 9  |
| Linoleic            | <b>C18:2ω6</b>    | 7.78 ± 0.75 <sup>A</sup>  | 5.51 ± 1.04 <sup>B</sup>   | 5.87 ± 0.66 <sup>B</sup>   | 2.46 ± 0.30 <sup>C</sup>   | 3.14 ± 0.40 <sup>C</sup>       | 10 |
| Arachidic           | <b>C20:0</b>      | 0.09 ± 0.04 <sup>A</sup>  | 0.03 ± 0.01 <sup>B</sup>   | 0.04 ± 0.02 <sup>AB</sup>  | 0.03 ± 0.01 <sup>B</sup>   | 0.04 ± 0.01 <sup>AB</sup>      | 11 |
| Gamma-linolenic     | <b>C18:3ω6</b>    | 0.18 ± 0.10 <sup>AB</sup> | 0.10 ± 0.02 <sup>A</sup>   | 0.07 ± 0.01 <sup>B</sup>   | 0.06 ± 0.02 <sup>BC</sup>  | 0.04 ± 0.01 <sup>C</sup>       | 12 |
| Linolenic           | <b>C18:3ω3</b>    | 0.44 ± 0.07 <sup>A</sup>  | 0.17 ± 0.06 <sup>BC</sup>  | 0.09 ± 0.03 <sup>B</sup>   | 0.24 ± 0.08 <sup>C</sup>   | 0.23 ± 0.08 <sup>C</sup>       | 13 |
| Eicosanoic          | <b>C20:1ω9</b>    | 0.00 ± 0.00               | 0.00 ± 0.00                | 0.00 ± 0.00                | 0.00 ± 0.00                | 0.00 ± 0.00                    | 14 |
| Conjugated Linoleic | <b>CLA 9c,11t</b> | 0.01 ± 0.03 <sup>A</sup>  | 0.01 ± 0.02 <sup>A</sup>   | 0.00 ± 0.00 <sup>A</sup>   | 0.00 ± 0.01 <sup>A</sup>   | 0.00 ± 0.01 <sup>A</sup>       | 15 |
| Eicosadienoic       | <b>C20:2ω6</b>    | 0.28 ± 0.03 <sup>A</sup>  | 0.16 ± 0.04 <sup>B</sup>   | 0.13 ± 0.03 <sup>B</sup>   | 0.07 ± 0.01 <sup>C</sup>   | 0.08 ± 0.02 <sup>C</sup>       | 16 |
| Eicosatrienoic      | <b>C20:3ω9</b>    | 0.11 ± 0.03 <sup>A</sup>  | 0.06 ± 0.02 <sup>BC</sup>  | 0.03 ± 0.02 <sup>B</sup>   | 0.10 ± 0.02 <sup>A</sup>   | 0.07 ± 0.02 <sup>C</sup>       | 17 |
| Behenic             | <b>C22:0</b>      | 0.05 ± 0.01 <sup>A</sup>  | 0.04 ± 0.02 <sup>AB</sup>  | 0.04 ± 0.02 <sup>AB</sup>  | 0.03 ± 0.01 <sup>B</sup>   | 0.04 ± 0.01 <sup>AB</sup>      | 18 |
| Dihomo-g-linolenic  | <b>C20:3ω6</b>    | 0.87 ± 0.13 <sup>A</sup>  | 0.38 ± 0.08 <sup>BC</sup>  | 0.44 ± 0.09 <sup>B</sup>   | 0.28 ± 0.05 <sup>C</sup>   | 0.37 ± 0.07 <sup>BC</sup>      | 19 |
| Arachidonic         | <b>C20:4ω6</b>    | 7.70 ± 1.18 <sup>A</sup>  | 5.83 ± 0.30 <sup>B</sup>   | 1.63 ± 0.20 <sup>CD</sup>  | 5.47 ± 0.32 <sup>B</sup>   | 1.02 ± 0.12 <sup>D</sup>       | 20 |
| Eicosapentaenoic    | <b>C20:5ω3</b>    | 0.08 ± 0.03 <sup>A</sup>  | 0.09 ± 0.02 <sup>A</sup>   | 0.76 ± 0.09 <sup>BC</sup>  | 0.08 ± 0.02 <sup>A</sup>   | 0.85 ± 0.08 <sup>C</sup>       | 21 |
| Lignoceric          | <b>C24:0</b>      | 0.09 ± 0.01 <sup>A</sup>  | 0.07 ± 0.01 <sup>AB</sup>  | 0.07 ± 0.01 <sup>AB</sup>  | 0.05 ± 0.01 <sup>BC</sup>  | 0.04 ± 0.00 <sup>C</sup>       | 22 |
| Adrenic             | <b>C22:4ω6</b>    | 2.53 ± 0.39 <sup>A</sup>  | 1.36 ± 0.31 <sup>B</sup>   | 0.13 ± 0.04 <sup>C</sup>   | 1.00 ± 0.19 <sup>B</sup>   | 0.08 ± 0.02 <sup>D</sup>       | 23 |
| Docosapentaenoic ω6 | <b>C22:5ω6</b>    | 0.61 ± 0.28 <sup>A</sup>  | 0.70 ± 0.24 <sup>A</sup>   | 0.91 ± 0.33 <sup>AB</sup>  | 0.65 ± 0.22 <sup>A</sup>   | 1.30 ± 0.36 <sup>B</sup>       | 24 |
| Docosapentaenoic ω3 | <b>C22:5ω3</b>    | 0.89 ± 0.10 <sup>A</sup>  | 0.50 ± 0.08 <sup>B</sup>   | 0.70 ± 0.12 <sup>C</sup>   | 0.26 ± 0.03 <sup>D</sup>   | 0.68 ± 0.10 <sup>C</sup>       | 25 |
| Docosahexaenoic     | <b>C22:6ω3</b>    | 3.04 ± 0.47 <sup>A</sup>  | 2.40 ± 0.09 <sup>B</sup>   | 8.88 ± 0.77 <sup>C</sup>   | 2.12 ± 0.12 <sup>D</sup>   | 8.87 ± 0.53 <sup>C</sup>       | 26 |
| Total SF            |                   | 44.45 ± 3.07 <sup>A</sup> | 58.39 ± 4.96 <sup>B</sup>  | 60.32 ± 2.94 <sup>B</sup>  | 60.61 ± 3.58 <sup>B</sup>  | 55.50 ± 2.61 <sup>B</sup>      | 27 |
| Total MUFA          |                   | 28.89 ± 3.46 <sup>A</sup> | 22.51 ± 3.62 <sup>B</sup>  | 18.67 ± 1.32 <sup>C</sup>  | 25.75 ± 2.67 <sup>AB</sup> | 26.90 ± 1.75 <sup>A</sup>      | 28 |
| Total ω-3 PUFA      |                   | 4.45 ± 0.61 <sup>A</sup>  | 3.12 ± 0.11 <sup>B</sup>   | 10.44 ± 0.84 <sup>C</sup>  | 2.69 ± 0.19 <sup>D</sup>   | 10.64 ± 0.63 <sup>C</sup>      | 29 |
| Total ω-6 PUFA      |                   | 19.93 ± 1.61 <sup>A</sup> | 14.31 ± 1.73 <sup>B</sup>  | 9.17 ± 1.06 <sup>C</sup>   | 9.98 ± 0.92 <sup>C</sup>   | 6.02 ± 0.67 <sup>D</sup>       | 30 |
| EPA+DHA             |                   | 3.12 ± 0.47 <sup>A</sup>  | 2.49 ± 0.09 <sup>B</sup>   | 9.65 ± 0.75 <sup>C</sup>   | 2.20 ± 0.12 <sup>D</sup>   | 9.72 ± 0.49 <sup>C</sup>       | 31 |

34 Data presented as mean ± SD. Difference between diets compared by ordinary one-way ANOVA followed by Tukey's multiple comparison. Nonparametric versions  
 35 of these tests were used when applicable. Unique letters indicate significant differences between groups (p<0.05).  
 36
