# Supplementary material for: Influence of total western diet on docosahexaenoic acid suppression of silica-triggered lupus flaring in NZBWF1 mice
Source: PubMed Central journal article supplement (PMC7228097; doi:10.1371/journal.pone.0233183), 2020-05-15
Supplement: pone.0233183.s002.pdf [file pone.0233183.s002.pdf]

**Table S2: Liver fatty acid content as determined by GLC**

| Common Name         | Chemical Formula  | VEH / CON                  | cSiO <sub>2</sub> / CON   | cSiO <sub>2</sub> / ↑DHA  | cSiO <sub>2</sub> / ↓SF.ω6 | cSiO <sub>2</sub> / ↓SF.ω6↑DHA |    |  |
|---------------------|-------------------|----------------------------|---------------------------|---------------------------|----------------------------|--------------------------------|----|--|
|                     |                   | (% of total fatty acids)   |                           |                           |                            |                                |    |  |
| Lauric              | <b>C12:0</b>      | 0.03 ± 0.01 <sup>AC</sup>  | 0.04 ± 0.01 <sup>A</sup>  | 0.04 ± 0.01 <sup>A</sup>  | 0.02 ± 0.01 <sup>B</sup>   | 0.02 ± 0.01 <sup>BC</sup>      | 39 |  |
| Myristic            | <b>C14:0</b>      | 0.57 ± 0.12 <sup>AC</sup>  | 0.54 ± 0.10 <sup>AC</sup> | 0.69 ± 0.08 <sup>A</sup>  | 0.31 ± 0.05 <sup>B</sup>   | 0.54 ± 0.03 <sup>C</sup>       | 40 |  |
| Palmitic            | <b>C16:0</b>      | 20.42 ± 0.55 <sup>A</sup>  | 20.33 ± 0.62 <sup>A</sup> | 24.96 ± 1.01 <sup>B</sup> | 14.45 ± 0.61 <sup>C</sup>  | 20.76 ± 1.15 <sup>A</sup>      | 41 |  |
| Palmitoleic         | <b>C16:1ω7t</b>   | 0.06 ± 0.01 <sup>A</sup>   | 0.06 ± 0.01 <sup>A</sup>  | 0.06 ± 0.01 <sup>AB</sup> | 0.04 ± 0.01 <sup>B</sup>   | 0.03 ± 0.01 <sup>C</sup>       | 42 |  |
| Palmitoleic         | <b>C16:1ω7c</b>   | 2.98 ± 0.48 <sup>AB</sup>  | 2.48 ± 0.40 <sup>A</sup>  | 3.28 ± 0.35 <sup>B</sup>  | 1.70 ± 0.26 <sup>C</sup>   | 2.58 ± 0.15 <sup>A</sup>       | 43 |  |
| Stearic             | <b>C18:0</b>      | 2.73 ± 0.52 <sup>ACD</sup> | 3.55 ± 0.52 <sup>B</sup>  | 3.41 ± 0.80 <sup>BC</sup> | 2.08 ± 0.25 <sup>D</sup>   | 2.10 ± 0.22 <sup>D</sup>       | 44 |  |
| Elaidic             | <b>C18:1ω9t</b>   | 0.07 ± 0.02 <sup>A</sup>   | 0.07 ± 0.01 <sup>A</sup>  | 0.06 ± 0.01 <sup>A</sup>  | 0.05 ± 0.02 <sup>A</sup>   | 0.04 ± 0.02 <sup>A</sup>       | 45 |  |
| Oleic               | <b>C18:1ω9c</b>   | 47.01 ± 1.04 <sup>A</sup>  | 44.79 ± 1.25 <sup>B</sup> | 36.04 ± 4.98 <sup>C</sup> | 65.50 ± 1.24 <sup>D</sup>  | 57.44 ± 0.47 <sup>E</sup>      | 46 |  |
| Linoleic            | <b>C18:2ω6</b>    | 15.64 ± 1.37 <sup>A</sup>  | 16.37 ± 1.64 <sup>A</sup> | 17.51 ± 3.12 <sup>A</sup> | 5.80 ± 0.46 <sup>B</sup>   | 6.96 ± 0.99 <sup>B</sup>       | 47 |  |
| Arachidic           | <b>C20:0</b>      | 0.00 ± 0.00 <sup>A</sup>   | 0.00 ± 0.00 <sup>A</sup>  | 0.00 ± 0.00 <sup>A</sup>  | 0.01 ± 0.02 <sup>A</sup>   | 0.00 ± 0.00 <sup>A</sup>       | 48 |  |
| Gamma-linolenic     | <b>C18:3ω6</b>    | 0.16 ± 0.05 <sup>A</sup>   | 0.18 ± 0.03 <sup>A</sup>  | 0.09 ± 0.02 <sup>C</sup>  | 0.08 ± 0.02 <sup>C</sup>   | 0.05 ± 0.02 <sup>C</sup>       | 49 |  |
| Linolenic           | <b>C18:3ω3</b>    | 0.50 ± 0.09 <sup>A</sup>   | 0.46 ± 0.10 <sup>A</sup>  | 1.17 ± 0.14 <sup>B</sup>  | 1.03 ± 0.14 <sup>BC</sup>  | 0.90 ± 0.05 <sup>C</sup>       | 50 |  |
| Eicosanoic          | <b>C20:1ω9</b>    | 0.49 ± 0.11 <sup>A</sup>   | 0.52 ± 0.09 <sup>A</sup>  | 0.03 ± 0.08 <sup>B</sup>  | 0.00 ± 0.00 <sup>B</sup>   | 0.00 ± 0.00 <sup>B</sup>       | 51 |  |
| Conjugated Linoleic | <b>CLA 9c,11t</b> | 0.14 ± 0.02 <sup>AC</sup>  | 0.13 ± 0.01 <sup>AC</sup> | 0.15 ± 0.00 <sup>A</sup>  | 0.00 ± 0.00 <sup>B</sup>   | 0.02 ± 0.03 <sup>C</sup>       | 52 |  |
| Eicosadienoic       | <b>C20:2ω6</b>    | 0.12 ± 0.02 <sup>A</sup>   | 0.15 ± 0.02 <sup>B</sup>  | 0.14 ± 0.03 <sup>AB</sup> | 0.05 ± 0.02 <sup>C</sup>   | 0.06 ± 0.02 <sup>C</sup>       | 53 |  |
| Eicosatrienoic      | <b>C20:3ω9</b>    | 0.05 ± 0.01 <sup>AC</sup>  | 0.07 ± 0.02 <sup>AB</sup> | 0.03 ± 0.01 <sup>AC</sup> | 0.13 ± 0.02 <sup>B</sup>   | 0.03 ± 0.01 <sup>C</sup>       | 54 |  |
| Behenic             | <b>C22:0</b>      | 0.00 ± 0.00                | 0.00 ± 0.00               | 0.00 ± 0.00               | 0.00 ± 0.00                | 0.00 ± 0.00                    | 55 |  |
| Dihomo-g-linolenic  | <b>C20:3ω6</b>    | 0.23 ± 0.02 <sup>ABC</sup> | 0.30 ± 0.05 <sup>AC</sup> | 0.32 ± 0.06 <sup>AB</sup> | 0.19 ± 0.02 <sup>C</sup>   | 0.15 ± 0.01 <sup>B</sup>       | 56 |  |
| Arachidonic         | <b>C20:4ω6</b>    | 1.39 ± 0.19 <sup>A</sup>   | 2.44 ± 0.57 <sup>B</sup>  | 0.73 ± 0.17 <sup>C</sup>  | 1.30 ± 0.19 <sup>A</sup>   | 0.27 ± 0.03 <sup>D</sup>       | 57 |  |
| Eicosapentaenoic    | <b>C20:5ω3</b>    | 0.06 ± 0.01 <sup>A</sup>   | 0.06 ± 0.02 <sup>A</sup>  | 0.88 ± 0.29 <sup>B</sup>  | 0.03 ± 0.01 <sup>C</sup>   | 0.59 ± 0.10 <sup>B</sup>       | 58 |  |
| Lignoceric          | <b>C24:0</b>      | 0.01 ± 0.01 <sup>A</sup>   | 0.00 ± 0.00 <sup>B</sup>  | 0.01 ± 0.01 <sup>AB</sup> | 0.00 ± 0.00 <sup>B</sup>   | 0.00 ± 0.00 <sup>B</sup>       | 59 |  |
| Adrenic             | <b>C22:4ω6</b>    | 0.06 ± 0.01 <sup>A</sup>   | 0.09 ± 0.03 <sup>B</sup>  | 0.04 ± 0.01 <sup>AC</sup> | 0.05 ± 0.02 <sup>A</sup>   | 0.02 ± 0.01 <sup>C</sup>       | 60 |  |
| Docosapentaenoic ω6 | <b>C22:5ω6</b>    | 0.32 ± 0.07 <sup>AB</sup>  | 0.37 ± 0.04 <sup>A</sup>  | 0.24 ± 0.03 <sup>B</sup>  | 0.60 ± 0.07 <sup>C</sup>   | 0.31 ± 0.06 <sup>AB</sup>      | 61 |  |
| Docosapentaenoic ω3 | <b>C22:5ω3</b>    | 0.09 ± 0.02 <sup>A</sup>   | 0.09 ± 0.02 <sup>A</sup>  | 0.35 ± 0.13 <sup>B</sup>  | 0.05 ± 0.02 <sup>C</sup>   | 0.16 ± 0.03 <sup>D</sup>       | 62 |  |
| Docosahexaenoic     | <b>C22:6ω3</b>    | 1.02 ± 0.26 <sup>A</sup>   | 1.55 ± 0.34 <sup>B</sup>  | 5.07 ± 2.05 <sup>C</sup>  | 0.73 ± 0.03 <sup>A</sup>   | 2.08 ± 0.44 <sup>BD</sup>      | 63 |  |
| Total SF            |                   | 24.10 ± 0.62 <sup>A</sup>  | 24.82 ± 0.99 <sup>A</sup> | 29.44 ± 0.71 <sup>B</sup> | 17.06 ± 0.78 <sup>C</sup>  | 23.60 ± 0.91 <sup>A</sup>      | 64 |  |
| Total MUFA          |                   | 55.42 ± 1.82 <sup>A</sup>  | 52.35 ± 1.75 <sup>B</sup> | 43.31 ± 6.03 <sup>C</sup> | 72.49 ± 1.31 <sup>D</sup>  | 64.56 ± 0.87 <sup>E</sup>      | 65 |  |
| Total ω-3 PUFA      |                   | 1.67 ± 0.31 <sup>A</sup>   | 2.16 ± 0.38 <sup>A</sup>  | 7.47 ± 2.54 <sup>B</sup>  | 1.91 ± 0.19 <sup>A</sup>   | 3.72 ± 0.60 <sup>C</sup>       | 66 |  |
| Total ω-6 PUFA      |                   | 18.05 ± 1.64 <sup>A</sup>  | 19.90 ± 1.65 <sup>A</sup> | 19.06 ± 3.35 <sup>A</sup> | 8.17 ± 0.63 <sup>B</sup>   | 7.82 ± 1.05 <sup>B</sup>       | 67 |  |
| EPA+DHA             |                   | 1.08 ± 0.26 <sup>A</sup>   | 1.60 ± 0.36 <sup>B</sup>  | 5.95 ± 2.33 <sup>C</sup>  | 0.75 ± 0.03 <sup>A</sup>   | 2.67 ± 0.54 <sup>D</sup>       | 68 |  |
|                     |                   |                            |                           |                           |                            |                                | 69 |  |

Data presented as mean ± SD. Difference between diets compared by ordinary one-way ANOVA followed by Tukey's multiple comparison. Nonparametric versions of these tests were used when applicable. Unique letters indicate significant differences between groups (p<0.05).
