# Supplementary material for: Influence of total western diet on docosahexaenoic acid suppression of silica-triggered lupus flaring in NZBWF1 mice
Source: PubMed Central journal article supplement (PMC7228097; doi:10.1371/journal.pone.0233183), 2020-05-15
Supplement: pone.0233183.s003.pdf [file pone.0233183.s003.pdf]

**Table S3: Kidney fatty acid content as determined by GLC**

| Common Name         | Chemical Formula  | VEH / CON                       | cSiO <sub>2</sub> / CON     | cSiO <sub>2</sub> / ↑DHA   | cSiO <sub>2</sub> / ↓SF.ω6  | cSiO <sub>2</sub> / ↓SF.ω6↑DHA |     |  |
|---------------------|-------------------|---------------------------------|-----------------------------|----------------------------|-----------------------------|--------------------------------|-----|--|
|                     |                   | <i>(% of total fatty acids)</i> |                             |                            |                             |                                |     |  |
| Lauric              | <b>C12:0</b>      | 0.12 ± 0.02 <sup>A</sup>        | 0.11 ± 0.06 <sup>AB</sup>   | 0.19 ± 0.06 <sup>A</sup>   | 0.03 ± 0.01 <sup>B</sup>    | 0.11 ± 0.04 <sup>A</sup>       | 74  |  |
| Myristic            | <b>C14:0</b>      | 1.22 ± 0.14 <sup>A</sup>        | 1.04 ± 0.54 <sup>A</sup>    | 1.57 ± 0.52 <sup>A</sup>   | 0.37 ± 0.16 <sup>B</sup>    | 1.08 ± 0.41 <sup>A</sup>       | 75  |  |
| Palmitic            | <b>C16:0</b>      | 19.72 ± 0.51 <sup>A</sup>       | 18.99 ± 1.30 <sup>A</sup>   | 22.78 ± 0.95 <sup>B</sup>  | 15.51 ± 1.18 <sup>C</sup>   | 18.79 ± 1.52 <sup>A</sup>      | 76  |  |
| Palmitoleic         | <b>C16:1ω7t</b>   | 0.08 ± 0.01 <sup>A</sup>        | 0.08 ± 0.01 <sup>A</sup>    | 0.09 ± 0.02 <sup>A</sup>   | 0.04 ± 0.01 <sup>B</sup>    | 0.04 ± 0.01 <sup>B</sup>       | 77  |  |
| Palmitoleic         | <b>C16:1ω7c</b>   | 5.27 ± 1.49 <sup>A</sup>        | 3.90 ± 2.05 <sup>AB</sup>   | 5.21 ± 1.53 <sup>A</sup>   | 2.09 ± 1.05 <sup>B</sup>    | 4.29 ± 1.88 <sup>AB</sup>      | 78  |  |
| Stearic             | <b>C18:0</b>      | 6.38 ± 1.92 <sup>A</sup>        | 7.94 ± 5.13 <sup>A</sup>    | 7.94 ± 2.63 <sup>A</sup>   | 10.46 ± 4.19 <sup>A</sup>   | 5.99 ± 3.42 <sup>A</sup>       | 79  |  |
| Elaidic             | <b>C18:1ω9t</b>   | 0.09 ± 0.02 <sup>A</sup>        | 0.08 ± 0.02 <sup>A</sup>    | 0.07 ± 0.01 <sup>A</sup>   | 0.04 ± 0.01 <sup>B</sup>    | 0.04 ± 0.01 <sup>B</sup>       | 80  |  |
| Oleic               | <b>C18:1ω9c</b>   | 36.25 ± 4.37 <sup>AB</sup>      | 33.02 ± 14.35 <sup>AB</sup> | 24.46 ± 7.23 <sup>A</sup>  | 34.15 ± 15.77 <sup>AB</sup> | 44.25 ± 12.23 <sup>B</sup>     | 81  |  |
| Linoleic            | <b>C18:2ω6</b>    | 14.75 ± 0.60 <sup>A</sup>       | 14.02 ± 2.13 <sup>A</sup>   | 15.79 ± 1.49 <sup>A</sup>  | 7.51 ± 0.05 <sup>B</sup>    | 8.21 ± 1.20 <sup>B</sup>       | 82  |  |
| Arachidic           | <b>C20:0</b>      | 0.06 ± 0.02 <sup>A</sup>        | 0.09 ± 0.03 <sup>A</sup>    | 0.06 ± 0.01 <sup>A</sup>   | 0.08 ± 0.02 <sup>A</sup>    | 0.06 ± 0.02 <sup>A</sup>       | 83  |  |
| Gamma-linolenic     | <b>C18:3ω6</b>    | 0.04 ± 0.01 <sup>A</sup>        | 0.05 ± 0.02 <sup>A</sup>    | 0.03 ± 0.01 <sup>AB</sup>  | 0.04 ± 0.01 <sup>A</sup>    | 0.02 ± 0.00 <sup>B</sup>       | 84  |  |
| Linolenic           | <b>C18:3ω3</b>    | 0.55 ± 0.10 <sup>A</sup>        | 0.46 ± 0.22 <sup>AC</sup>   | 0.63 ± 0.15 <sup>A</sup>   | 0.15 ± 0.07 <sup>B</sup>    | 0.26 ± 0.09 <sup>BC</sup>      | 85  |  |
| Eicosanoic          | <b>C20:1ω9</b>    | 0.26 ± 0.05 <sup>A</sup>        | 0.28 ± 0.07 <sup>A</sup>    | 0.16 ± 0.03 <sup>B</sup>   | 0.35 ± 0.03 <sup>C</sup>    | 0.23 ± 0.04 <sup>AB</sup>      | 86  |  |
| Conjugated Linoleic | <b>CLA 9c,11t</b> | 0.15 ± 0.03 <sup>A</sup>        | 0.14 ± 0.04 <sup>A</sup>    | 0.14 ± 0.03 <sup>A</sup>   | 0.05 ± 0.01 <sup>B</sup>    | 0.05 ± 0.03 <sup>B</sup>       | 87  |  |
| Eicosadienoic       | <b>C20:2ω6</b>    | 0.15 ± 0.02 <sup>A</sup>        | 0.16 ± 0.08 <sup>A</sup>    | 0.16 ± 0.04 <sup>A</sup>   | 0.13 ± 0.05 <sup>AB</sup>   | 0.08 ± 0.03 <sup>B</sup>       | 88  |  |
| Eicosatrienoic      | <b>C20:3ω9</b>    | 0.04 ± 0.01 <sup>A</sup>        | 0.04 ± 0.02 <sup>A</sup>    | 0.03 ± 0.02 <sup>A</sup>   | 0.14 ± 0.05 <sup>B</sup>    | 0.05 ± 0.03 <sup>A</sup>       | 89  |  |
| Behenic             | <b>C22:0</b>      | 0.04 ± 0.01 <sup>A</sup>        | 0.05 ± 0.03 <sup>A</sup>    | 0.05 ± 0.03 <sup>A</sup>   | 0.06 ± 0.02 <sup>A</sup>    | 0.04 ± 0.02 <sup>A</sup>       | 90  |  |
| Dihomo-g-linolenic  | <b>C20:3ω6</b>    | 0.31 ± 0.08 <sup>A</sup>        | 0.40 ± 0.31 <sup>A</sup>    | 0.50 ± 0.21 <sup>A</sup>   | 0.64 ± 0.28 <sup>A</sup>    | 0.37 ± 0.27 <sup>A</sup>       | 91  |  |
| Arachidonic         | <b>C20:4ω6</b>    | 6.53 ± 2.56 <sup>AB</sup>       | 9.11 ± 8.73 <sup>AB</sup>   | 3.95 ± 2.02 <sup>AB</sup>  | 15.33 ± 7.30 <sup>A</sup>   | 2.14 ± 1.72 <sup>A</sup>       | 92  |  |
| Eicosapentaenoic    | <b>C20:5ω3</b>    | 0.09 ± 0.02 <sup>A</sup>        | 0.12 ± 0.11 <sup>A</sup>    | 2.03 ± 0.98 <sup>B</sup>   | 0.16 ± 0.07 <sup>A</sup>    | 2.26 ± 1.73 <sup>B</sup>       | 93  |  |
| Lignoceric          | <b>C24:0</b>      | 0.05 ± 0.02 <sup>A</sup>        | 0.07 ± 0.05 <sup>A</sup>    | 0.07 ± 0.03 <sup>A</sup>   | 0.09 ± 0.04 <sup>A</sup>    | 0.05 ± 0.02 <sup>A</sup>       | 94  |  |
| Adrenic             | <b>C22:4ω6</b>    | 0.15 ± 0.05 <sup>AD</sup>       | 0.24 ± 0.22 <sup>AD</sup>   | 0.02 ± 0.01 <sup>B</sup>   | 0.33 ± 0.14 <sup>AC</sup>   | 0.02 ± 0.01 <sup>BD</sup>      | 95  |  |
| Docosapentaenoic ω6 | <b>C22:5ω6</b>    | 0.20 ± 0.04 <sup>A</sup>        | 0.55 ± 0.55 <sup>AB</sup>   | 0.55 ± 0.31 <sup>AB</sup>  | 0.94 ± 0.44 <sup>B</sup>    | 0.34 ± 0.16 <sup>AB</sup>      | 96  |  |
| Docosapentaenoic ω3 | <b>C22:5ω3</b>    | 0.18 ± 0.06 <sup>A</sup>        | 0.27 ± 0.19 <sup>A</sup>    | 0.33 ± 0.17 <sup>A</sup>   | 0.26 ± 0.15 <sup>A</sup>    | 0.21 ± 0.06 <sup>A</sup>       | 97  |  |
| Docosahexaenoic     | <b>C22:6ω3</b>    | 2.84 ± 0.99 <sup>A</sup>        | 4.12 ± 3.88 <sup>AB</sup>   | 8.95 ± 4.22 <sup>B</sup>   | 6.33 ± 2.87 <sup>AB</sup>   | 7.37 ± 5.17 <sup>AB</sup>      | 98  |  |
|                     |                   |                                 |                             |                            |                             |                                | 99  |  |
|                     |                   |                                 |                             |                            |                             |                                | 100 |  |
| Total SF            |                   | 27.97 ± 1.67 <sup>A</sup>       | 28.68 ± 4.35 <sup>AB</sup>  | 33.07 ± 1.54 <sup>B</sup>  | 26.87 ± 5.13 <sup>A</sup>   | 26.33 ± 3.16 <sup>A</sup>      | 101 |  |
| Total MUFA          |                   | 44.98 ± 4.80 <sup>A</sup>       | 40.39 ± 16.16 <sup>A</sup>  | 32.44 ± 8.43 <sup>A</sup>  | 39.91 ± 16.76 <sup>A</sup>  | 51.52 ± 13.53 <sup>A</sup>     | 102 |  |
| Total ω-3 PUFA      |                   | 3.66 ± 1.03 <sup>A</sup>        | 4.96 ± 3.97 <sup>A</sup>    | 11.94 ± 5.19 <sup>B</sup>  | 6.91 ± 3.00 <sup>AB</sup>   | 10.13 ± 6.93 <sup>AB</sup>     | 103 |  |
| Total ω-6 PUFA      |                   | 22.12 ± 2.26 <sup>A</sup>       | 24.53 ± 7.86 <sup>A</sup>   | 21.00 ± 1.76 <sup>AB</sup> | 24.90 ± 8.26 <sup>A</sup>   | 11.18 ± 3.27 <sup>B</sup>      | 104 |  |
| EPA+DHA             |                   | 2.93 ± 1.01 <sup>A</sup>        | 4.24 ± 3.98 <sup>A</sup>    | 10.98 ± 5.18 <sup>B</sup>  | 6.94 ± 2.94 <sup>AB</sup>   | 9.62 ± 6.89 <sup>AB</sup>      | 105 |  |

106

107

108

109

110

Data presented as mean ± SD. Difference between diets compared by ordinary one-way ANOVA followed by Tukey's multiple comparison. Nonparametric versions of these tests were used when applicable. Unique letters indicate significant differences between groups (p<0.05).
