# Supplementary material for: Influence of total western diet on docosahexaenoic acid suppression of silica-triggered lupus flaring in NZBWF1 mice
Source: PubMed Central journal article supplement (PMC7228097; doi:10.1371/journal.pone.0233183), 2020-05-15
Supplement: pone.0233183.s004.pdf [file pone.0233183.s004.pdf]

Table S4: Spleen fatty acid content as determined by GLC

| Common Name         | Chemical Formula  | VEH / CON                  | cSiO <sub>2</sub> / CON   | cSiO <sub>2</sub> / ↑DHA   | cSiO <sub>2</sub> / ↓SF.ω6 | cSiO <sub>2</sub> / ↓SF.ω6↑DHA |
|---------------------|-------------------|----------------------------|---------------------------|----------------------------|----------------------------|--------------------------------|
|                     |                   | (% of total fatty acids)   |                           |                            |                            |                                |
| Lauric              | <b>C12:0</b>      | 0.11 ± 0.03 <sup>A</sup>   | 0.10 ± 0.03 <sup>A</sup>  | 0.19 ± 0.07 <sup>B</sup>   | 0.04 ± 0.01 <sup>C</sup>   | 0.11 ± 0.04 <sup>AB</sup>      |
| Myristic            | <b>C14:0</b>      | 1.18 ± 0.31 <sup>A</sup>   | 1.17 ± 0.17 <sup>A</sup>  | 1.85 ± 0.52 <sup>A</sup>   | 0.61 ± 0.13 <sup>B</sup>   | 1.22 ± 0.29 <sup>A</sup>       |
| Palmitic            | <b>C16:0</b>      | 22.06 ± 2.29 <sup>A</sup>  | 21.48 ± 1.75 <sup>A</sup> | 25.82 ± 1.95 <sup>BC</sup> | 19.50 ± 2.89 <sup>A</sup>  | 23.40 ± 1.98 <sup>C</sup>      |
| Palmitolaidic       | <b>C16:1ω7t</b>   | 0.11 ± 0.03 <sup>A</sup>   | 0.09 ± 0.01 <sup>A</sup>  | 0.10 ± 0.02 <sup>A</sup>   | 0.05 ± 0.01 <sup>B</sup>   | 0.05 ± 0.02 <sup>B</sup>       |
| Palmitoleic         | <b>C16:1ω7c</b>   | 5.20 ± 2.10 <sup>A</sup>   | 4.97 ± 1.14 <sup>A</sup>  | 5.69 ± 2.08 <sup>A</sup>   | 3.30 ± 1.46 <sup>A</sup>   | 4.80 ± 2.18 <sup>A</sup>       |
| Stearic             | <b>C18:0</b>      | 7.36 ± 5.00 <sup>A</sup>   | 6.52 ± 3.01 <sup>A</sup>  | 7.28 ± 4.02 <sup>A</sup>   | 8.29 ± 3.95 <sup>A</sup>   | 7.27 ± 3.27 <sup>A</sup>       |
| Elaidic             | <b>C18:1ω9t</b>   | 0.11 ± 0.01 <sup>A</sup>   | 0.10 ± 0.03 <sup>A</sup>  | 0.08 ± 0.03 <sup>AB</sup>  | 0.04 ± 0.02 <sup>B</sup>   | 0.10 ± 0.06 <sup>A</sup>       |
| Oleic               | <b>C18:1ω9c</b>   | 32.81 ± 13.13 <sup>A</sup> | 38.21 ± 4.84 <sup>A</sup> | 26.20 ± 9.55 <sup>A</sup>  | 39.67 ± 14.74 <sup>A</sup> | 37.40 ± 11.72 <sup>A</sup>     |
| Linoleic            | <b>C18:2ω6</b>    | 12.34 ± 2.92 <sup>A</sup>  | 12.52 ± 1.67 <sup>A</sup> | 14.24 ± 2.63 <sup>A</sup>  | 5.65 ± 0.37 <sup>B</sup>   | 7.37 ± 0.37 <sup>C</sup>       |
| Arachidic           | <b>C20:0</b>      | 0.03 ± 0.03 <sup>A</sup>   | 0.02 ± 0.04 <sup>A</sup>  | 0.02 ± 0.03 <sup>A</sup>   | 0.03 ± 0.03 <sup>A</sup>   | 0.03 ± 0.04 <sup>A</sup>       |
| Gamma-linolenic     | <b>C18:3ω6</b>    | 0.01 ± 0.01 <sup>A</sup>   | 0.01 ± 0.02 <sup>A</sup>  | 0.01 ± 0.03 <sup>A</sup>   | 0.01 ± 0.00 <sup>A</sup>   | 0.01 ± 0.03 <sup>A</sup>       |
| Linolenic           | <b>C18:3ω3</b>    | 0.78 ± 0.13 <sup>A</sup>   | 0.73 ± 0.11 <sup>A</sup>  | 0.80 ± 0.14 <sup>A</sup>   | 0.56 ± 0.12 <sup>AB</sup>  | 0.33 ± 0.10 <sup>B</sup>       |
| Eicosanoic          | <b>C20:1ω9</b>    | 0.00 ± 0.00                | 0.00 ± 0.00               | 0.00 ± 0.00                | 0.00 ± 0.00                | 0.00 ± 0.00                    |
| Conjugated Linoleic | <b>CLA 9c,11t</b> | 0.08 ± 0.09 <sup>A</sup>   | 0.11 ± 0.07 <sup>A</sup>  | 0.09 ± 0.09 <sup>A</sup>   | 0.02 ± 0.04 <sup>A</sup>   | 0.01 ± 0.03 <sup>A</sup>       |
| Eicosadienoic       | <b>C20:2ω6</b>    | 0.28 ± 0.16 <sup>A</sup>   | 0.24 ± 0.08 <sup>A</sup>  | 0.27 ± 0.18 <sup>A</sup>   | 0.22 ± 0.12 <sup>A</sup>   | 0.17 ± 0.09 <sup>A</sup>       |
| Eicosatrienoic      | <b>C20:3ω9</b>    | 0.04 ± 0.04 <sup>A</sup>   | 0.06 ± 0.03 <sup>AB</sup> | 0.02 ± 0.03 <sup>A</sup>   | 0.14 ± 0.06 <sup>B</sup>   | 0.05 ± 0.03 <sup>AB</sup>      |
| Behenic             | <b>C22:0</b>      | 0.18 ± 0.17 <sup>A</sup>   | 0.18 ± 0.09 <sup>A</sup>  | 0.30 ± 0.31 <sup>A</sup>   | 0.28 ± 0.24 <sup>A</sup>   | 0.02 ± 0.02 <sup>A</sup>       |
| Dihomo-g-linolenic  | <b>C20:3ω6</b>    | 0.41 ± 0.32 <sup>A</sup>   | 0.35 ± 0.17 <sup>A</sup>  | 0.62 ± 0.45 <sup>A</sup>   | 0.53 ± 0.26 <sup>A</sup>   | 0.67 ± 0.33 <sup>A</sup>       |
| Arachidonic         | <b>C20:4ω6</b>    | 7.21 ± 6.14 <sup>AB</sup>  | 4.60 ± 3.75 <sup>A</sup>  | 2.61 ± 2.19 <sup>AB</sup>  | 9.54 ± 5.28 <sup>A</sup>   | 1.88 ± 0.98 <sup>B</sup>       |
| Eicosapentaenoic    | <b>C20:5ω3</b>    | 0.06 ± 0.05 <sup>A</sup>   | 0.05 ± 0.02 <sup>A</sup>  | 0.70 ± 0.51 <sup>AB</sup>  | 0.06 ± 0.04 <sup>A</sup>   | 1.19 ± 0.64 <sup>B</sup>       |
| Lignoceric          | <b>C24:0</b>      | 0.03 ± 0.05 <sup>A</sup>   | 0.10 ± 0.08 <sup>AB</sup> | 0.09 ± 0.04 <sup>AB</sup>  | 0.20 ± 0.15 <sup>B</sup>   | 0.04 ± 0.03 <sup>AB</sup>      |
| Adrenic             | <b>C22:4ω6</b>    | 1.11 ± 0.99 <sup>AB</sup>  | 0.84 ± 0.32 <sup>A</sup>  | 0.15 ± 0.14 <sup>B</sup>   | 1.72 ± 0.91 <sup>A</sup>   | 0.08 ± 0.06 <sup>B</sup>       |
| Docosapentaenoic ω6 | <b>C22:5ω6</b>    | 0.70 ± 0.58 <sup>A</sup>   | 0.56 ± 0.19 <sup>A</sup>  | 0.98 ± 0.87 <sup>A</sup>   | 1.08 ± 0.77 <sup>A</sup>   | 0.34 ± 0.38 <sup>A</sup>       |
| Docosapentaenoic ω3 | <b>C22:5ω3</b>    | 0.51 ± 0.42 <sup>A</sup>   | 0.37 ± 0.16 <sup>A</sup>  | 0.69 ± 0.54 <sup>A</sup>   | 0.41 ± 0.19 <sup>A</sup>   | 0.83 ± 0.46 <sup>A</sup>       |
| Docosahexaenoic     | <b>C22:6ω3</b>    | 1.86 ± 1.61 <sup>A</sup>   | 1.41 ± 0.44 <sup>A</sup>  | 6.11 ± 4.38 <sup>AB</sup>  | 2.72 ± 1.42 <sup>AB</sup>  | 7.66 ± 4.32 <sup>B</sup>       |
| Total SF            |                   | 31.44 ± 7.13 <sup>A</sup>  | 30.01 ± 4.74 <sup>A</sup> | 36.21 ± 4.50 <sup>A</sup>  | 29.27 ± 6.99 <sup>A</sup>  | 32.49 ± 4.85 <sup>A</sup>      |
| Total MUFA          |                   | 41.77 ± 14.70 <sup>A</sup> | 47.29 ± 4.59 <sup>A</sup> | 35.17 ± 11.03 <sup>A</sup> | 47.14 ± 15.77 <sup>A</sup> | 45.83 ± 12.21 <sup>A</sup>     |
| Total ω-3 PUFA      |                   | 3.21 ± 2.00 <sup>A</sup>   | 2.54 ± 0.54 <sup>A</sup>  | 8.29 ± 5.29 <sup>A</sup>   | 3.74 ± 1.71 <sup>A</sup>   | 10.01 ± 5.52 <sup>A</sup>      |
| Total ω-6 PUFA      |                   | 22.05 ± 5.33 <sup>A</sup>  | 19.85 ± 1.18 <sup>A</sup> | 18.89 ± 1.80 <sup>A</sup>  | 18.75 ± 6.87 <sup>AB</sup> | 10.53 ± 1.78 <sup>B</sup>      |
| EPA+DHA             |                   | 1.92 ± 1.66 <sup>A</sup>   | 1.45 ± 0.45 <sup>A</sup>  | 6.81 ± 4.89 <sup>AB</sup>  | 2.79 ± 1.45 <sup>AB</sup>  | 8.86 ± 4.96 <sup>B</sup>       |

Data presented as mean ± SD. Difference between diets compared by ordinary one-way ANOVA followed by Tukey's multiple comparison. Nonparametric versions of these tests were used when applicable. Unique letters indicate significant differences between groups (p<0.05).
