# Supplementary material for: Influence of total western diet on docosahexaenoic acid suppression of silica-triggered lupus flaring in NZBWF1 mice
Source: PubMed Central journal article supplement (PMC7228097; doi:10.1371/journal.pone.0233183), 2020-05-15
Supplement: pone.0233183.s005.pdf [file pone.0233183.s005.pdf]

**Table S5: Histopathology severity scores, lungs**

| Experimental Group                    | LYMPHOID AGGREGATES    | ECTOPIC LYMPHOID STRUCTURES | ALVEOLITIS<br>118          |
|---------------------------------------|------------------------|-----------------------------|----------------------------|
| <b>VEH / CON</b>                      | 0 ± 0.1                | 0 ± 0                       | 0 ± 0.1                    |
| <b>cSiO<sub>2</sub> / CON</b>         | 3.4 ± 0.3*             | 2.8 ± 0.4*                  | 3.5 ± 0.3* 119             |
| <b>cSiO<sub>2</sub> / ↑DHA</b>        | 1.2 ± 0.3 <sup>#</sup> | 0.1 ± 0.1 <sup>#</sup>      | 2.4 ± 0.2 <sup>#</sup> 120 |
| <b>cSiO<sub>2</sub> / ↓SF.ω-6</b>     | 2.6 ± 0.2              | 1.5 ± 0.2 <sup>#</sup>      | 2.4 ± 0.2 <sup>#</sup> 121 |
| <b>cSiO<sub>2</sub> / ↓SF.ω-6↑DHA</b> | 1.4 ± 0.3 <sup>#</sup> | 0 ± 0 <sup>#</sup>          | 1.1 ± 0.2 <sup>#</sup> 122 |

Mice were graded individual for extent of lymphoid aggregation, ectopic lymphoid structure development, and alveolitis (% of total pulmonary tissue examined) as follows: 0 = no changes; 1, minimal (<10%); 2, slight (10-25%); 3, moderate (26-50%); 4, severe (51-75%); 5, very severe (>75%). Data are mean ± SEM. \*Indicates significant difference between VEH/CON and cSiO<sub>2</sub>/CON groups, as measured by unpaired T test (p<0.05) #Indicates significant difference from cSiO<sub>2</sub>/Con group, as measured by ordinary one-way ANOVA with Dunnett's multiple comparison test (p<0.05)
