# Supplementary material for: Influence of total western diet on docosahexaenoic acid suppression of silica-triggered lupus flaring in NZBWF1 mice
Source: PubMed Central journal article supplement (PMC7228097; doi:10.1371/journal.pone.0233183), 2020-05-15
Supplement: pone.0233183.s006.pdf [file pone.0233183.s006.pdf]

**Table S6: Urinary protein at 18, 20, and 22 weeks of age.**

|                    | <b>Experimental Diets</b>           |                               |                                |                                  |                                      |
|--------------------|-------------------------------------|-------------------------------|--------------------------------|----------------------------------|--------------------------------------|
|                    | <b>VEH / CON</b>                    | <b>cSiO<sub>2</sub> / CON</b> | <b>cSiO<sub>2</sub> / ↑DHA</b> | <b>cSiO<sub>2</sub> / ↓SF.ω6</b> | <b>cSiO<sub>2</sub> / ↓SF.ω6↑DHA</b> |
| <b>Age (weeks)</b> | <i>Protein concentration, mg/dL</i> |                               |                                |                                  |                                      |
| 18                 | 61.73 ± 9.77                        | 62.62 ± 12.05                 | 90.00 ± 8.38                   | 58.45 ± 7.20                     | 69.56 ± 7.66                         |
| 20                 | 56.88 ± 11.88                       | 64.09 ± 9.21                  | 80.24 ± 5.85                   | 76.65 ± 11.08                    | 106.36 ± 31.53                       |
| 22                 | 233.84 ± 63.18                      | 183.64 ± 38.50                | 201.05 ± 24.86                 | 134.45 ± 21.15                   | 214.09 ± 22.68                       |

Data presented as mean ± SE. No significant difference was observed between cSiO<sub>2</sub> and any of the groups in week 18, 20, or 22. Mice were euthanized at age 22 weeks
