# Supplementary material for: Influence of total western diet on docosahexaenoic acid suppression of silica-triggered lupus flaring in NZBWF1 mice
Source: PubMed Central journal article supplement (PMC7228097; doi:10.1371/journal.pone.0233183), 2020-05-15
Supplement: pone.0233183.s007.pdf [file pone.0233183.s007.pdf]

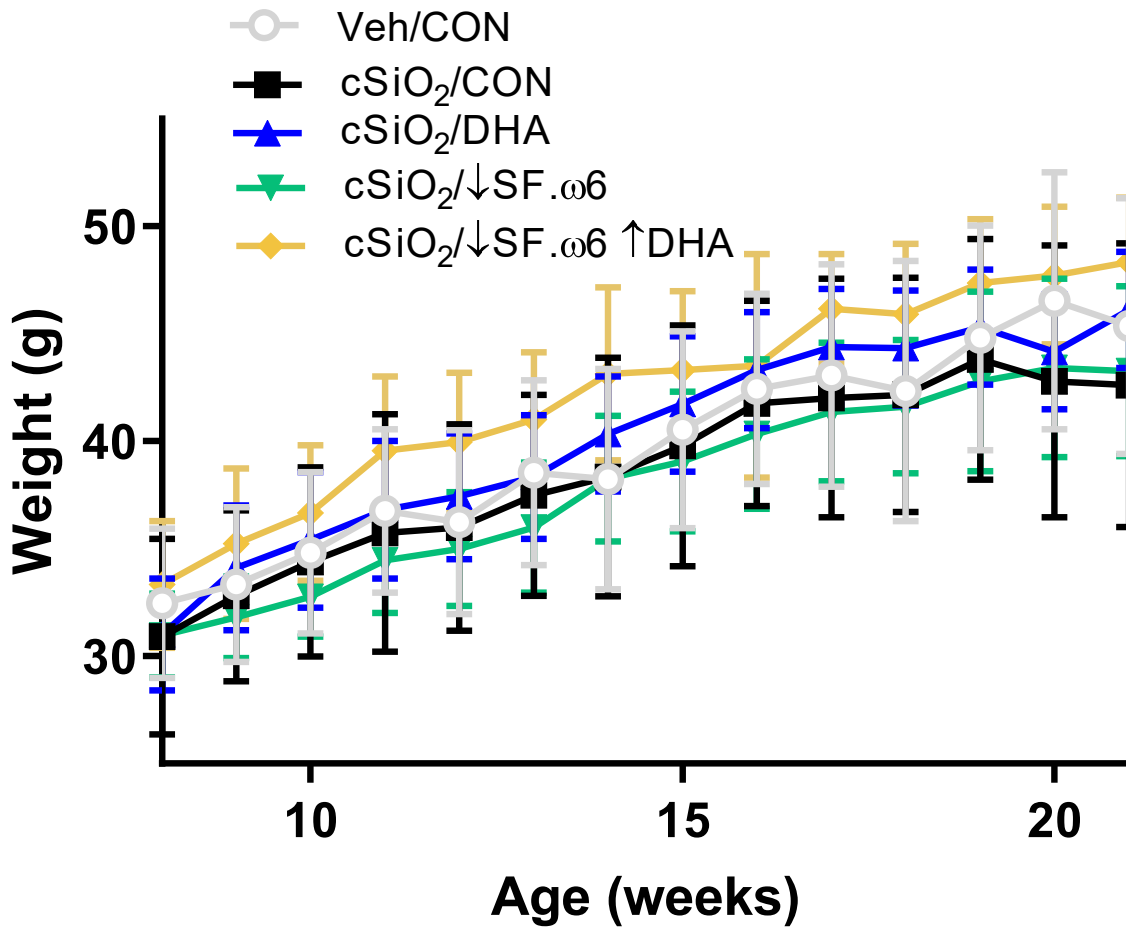

**Supplemental Figure S1. Experimental diets did not affect mouse body weight** Mice fed isocaloric experimental diets showed no significant difference between body weight at any time point.
