# Supplementary material for: Influence of total western diet on docosahexaenoic acid suppression of silica-triggered lupus flaring in NZBWF1 mice
Source: PubMed Central journal article supplement (PMC7228097; doi:10.1371/journal.pone.0233183), 2020-05-15
Supplement: pone.0233183.s008.pdf [file pone.0233183.s008.pdf]

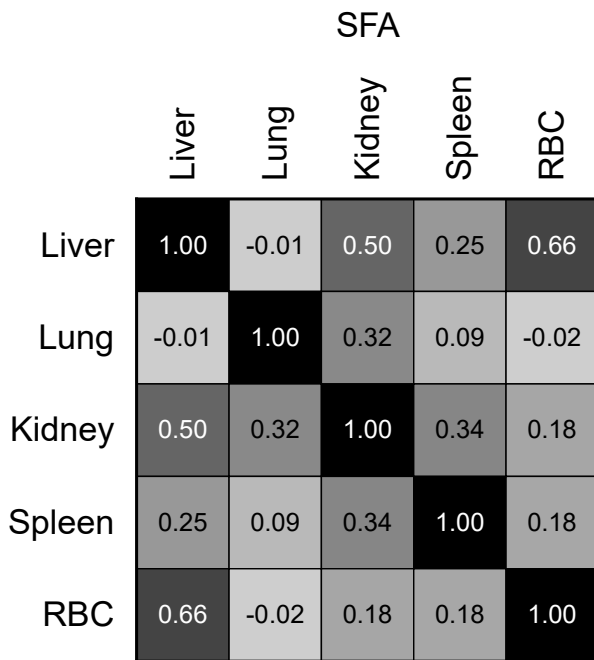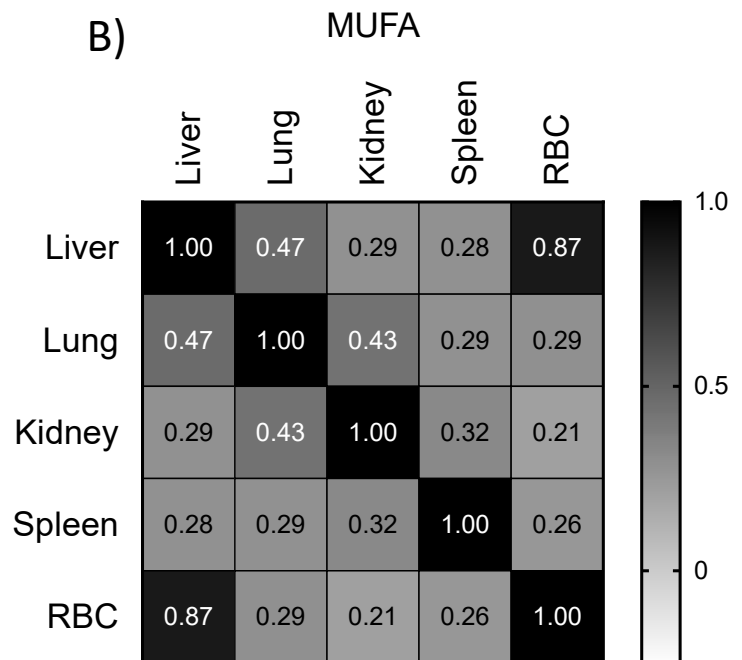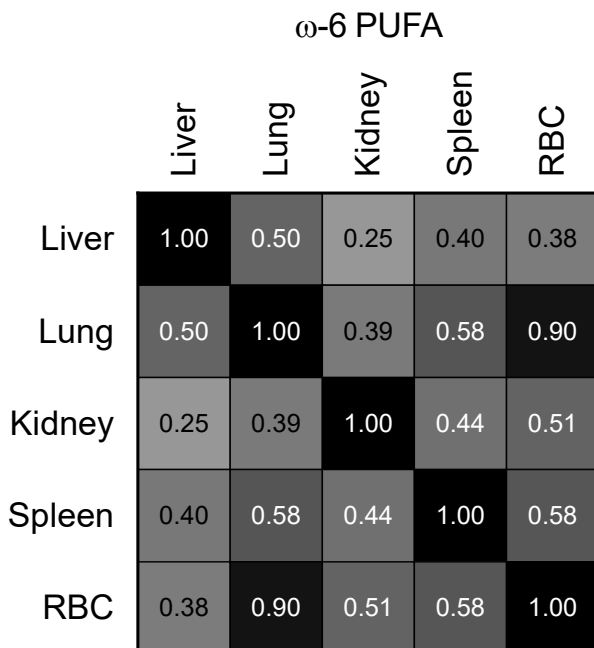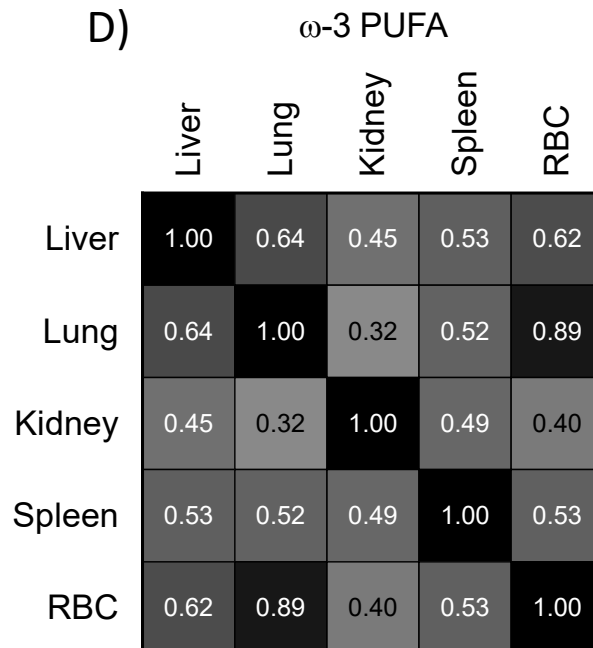

**Supplemental Figure S2: Correlation between RBC and tissues for SFA, MUFA, ω-6 PUFA, and ω-3 PUFA.** Correlation matrix presenting Pearson's correlation coefficients comparing RBC and tissue levels of SFA (A), MUFA (B), ω-6 PUFA (C), and ω-3 PUFA (D).
